# Supplementary material for: Large-scale analysis of neurite growth dynamics on micropatterned substrates
Source: Royal Society of Chemistry journal article supplement (doi:10.1039/c0ib00058b), 2010-10-25
Supplement: c0ib00058b.pdf [file c0ib00058b.pdf]

## **Large-scale Analysis of Neurite Growth Dynamics on Micropatterned Substrates**

### **Authors:**

Zachary D. Wissner-Gross<sup>a,b</sup>, Mark A. Scott<sup>b,c</sup>, David Ku<sup>c</sup>, Priya Ramaswamy<sup>c</sup> and Mehmet Fatih Yanik<sup>c,d,e</sup>

### **Author affiliations:**

<sup>a</sup> Department of Physics, Harvard University, 17 Oxford Street, Cambridge, MA 02138, USA

<sup>b</sup> Harvard-MIT Division of Health, Science, and Technology, 77 Massachusetts Avenue, Cambridge, MA 02139, USA

<sup>c</sup> Department of Electrical Engineering and Computer Science, Massachusetts Institute of Technology, 77 Massachusetts Avenue, Cambridge, MA 02139, USA

<sup>d</sup> Department of Biological Engineering, Massachusetts Institute of Technology, 77 Massachusetts Avenue, Cambridge, MA 02139, USA

### **Corresponding author:**

<sup>e</sup> Massachusetts Institute of Technology, 77 Massachusetts Avenue, Room 36-834, Cambridge, MA 02139. Tel.: 617-253-1583; Fax: 617-324-3534; E-mail: yanik@mit.edu

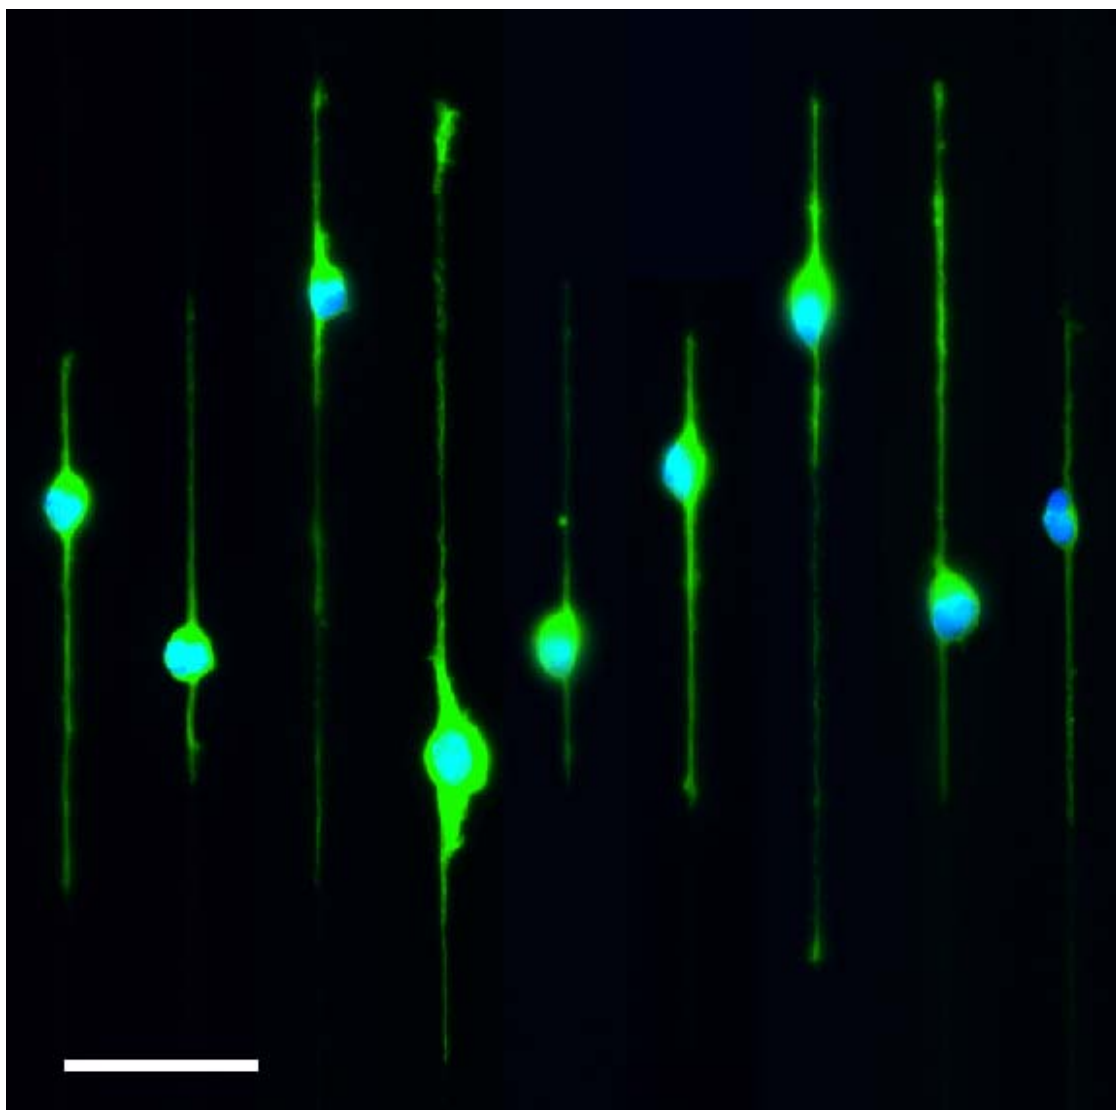

**Fig. S1:** Immunohistochemical staining of hippocampal neurons and their neurites. Nuclei are shown in blue (DAPI) and tubulin in green (see Methods). The average full-width at half-maximum of the tubulin profiles was  $1.15 \mu\text{m}$ , and showed little variation ( $\pm 0.15 \mu\text{m}$ , SD), consistent with the diameter of single immature neurites of hippocampal neurons on two-dimensional PDL-coated surfaces (scale bar:  $50 \mu\text{m}$ ).

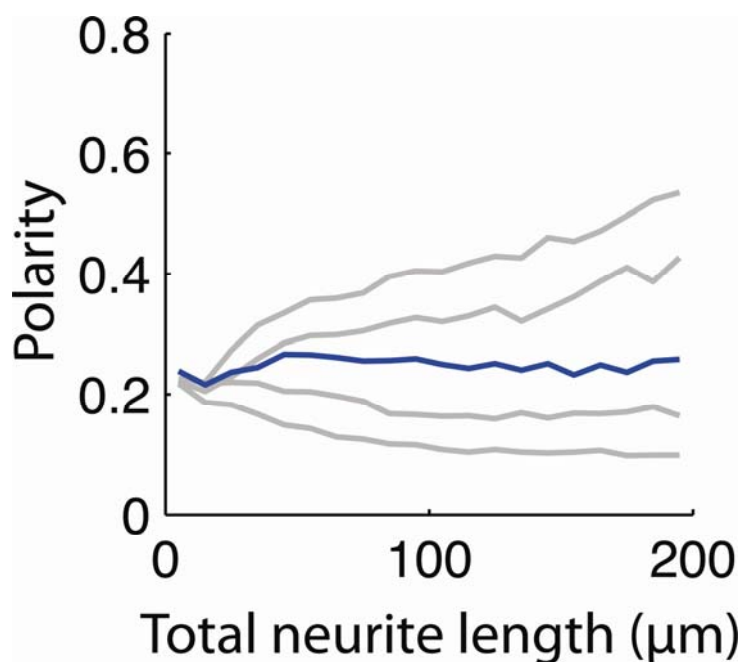

**Fig. S2:** Effect of vesicle trafficking rate on neuronal polarization in the Fivaz *et al.* model. Each line shows how neuronal polarity evolves as a function of total neurite length for different fixed vesicle trafficking rates. The bottom-most line was generated using a vesicle trafficking rate of 0.2 vesicles/minute, and successive lines represent increases of 0.2 vesicles/minute. The polarization diminished for the lowest three rates (0.2, 0.4, and 0.6 vesicles/minute) once the total neurite length exceeded 100  $\mu\text{m}$ . For the highest two rates (0.8 and 1.0 vesicles/minute), neurons continued to polarize after 100  $\mu\text{m}$ . The blue line (0.6 vesicles/minute) indicates where this behavioral transition occurs.
